# Supplementary material
Source: publisher figshare collection journal article supplement (https://karger.figshare.com/ndownloader/files/8717371)
Supplement: Supplementary file 1 [file 8717371]

**Suppl. Table 3.** Univariate and stepwise multivariate logistic regression analyses to identify independent variables that have a significant association with the mode of delivery (operative delivery versus spontaneous vaginal delivery).

|  | **Univariate analyses** | |  | **Multivariate analyses** | |
| --- | --- | --- | --- | --- | --- |
|  | Odds ratio (95% confidence interval) | p value |  | Odds ratio (95% confidence interval) | p value |
|  |  |  |  |  |  |
| Subpubic angle | 0.929 (0.894–0.966) | <0.001 |  | 0.931 (0.895–0.969) | <0.001 |
| Age (years) | 1.087 (1.025–1.153) | 0.006 |  | 1.083 (1.018–1.151) | 0.012 |
| Epidural analgesia | 2.095 (1.067–4.114) | 0.032 |  |  |  |
| Birth weight (g) | 1.000 (0.999–1.001) | 0.905 |  |  |  |
| BMI (kg/m2) | 0.942 (0.865–1.026) | 0.170 |  |  |  |
| Gestational age at delivery | 1.015 (0.664–1.552) | 0.945 |  |  |  |
| Induction of labor | 1.176 (0.595–2.325) | 0.641 |  |  |  |
